# Supplementary material for: DNA Damage, Somatic Aneuploidy, and Malignant Sarcoma Susceptibility in Muscular Dystrophies
Source: PubMed Central journal article supplement (PMC3077392; doi:10.1371/journal.pgen.1002042), 2011-04-14

**A**

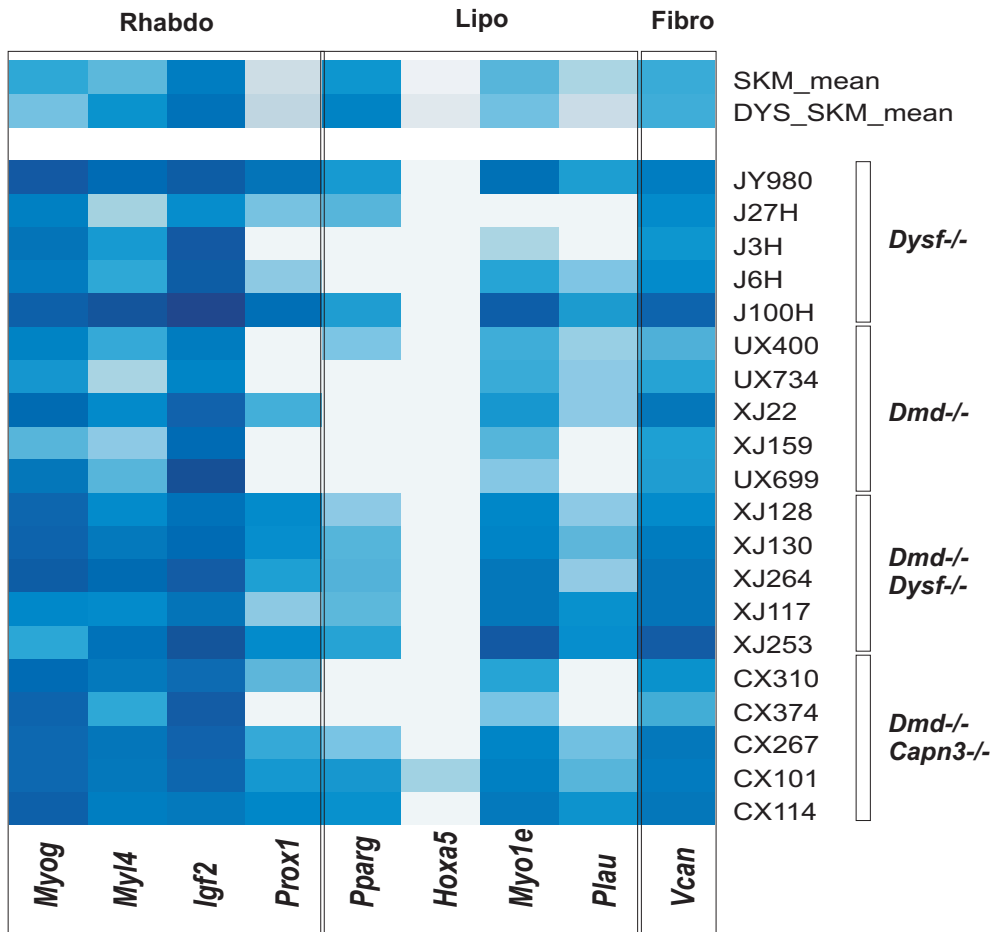

**B**

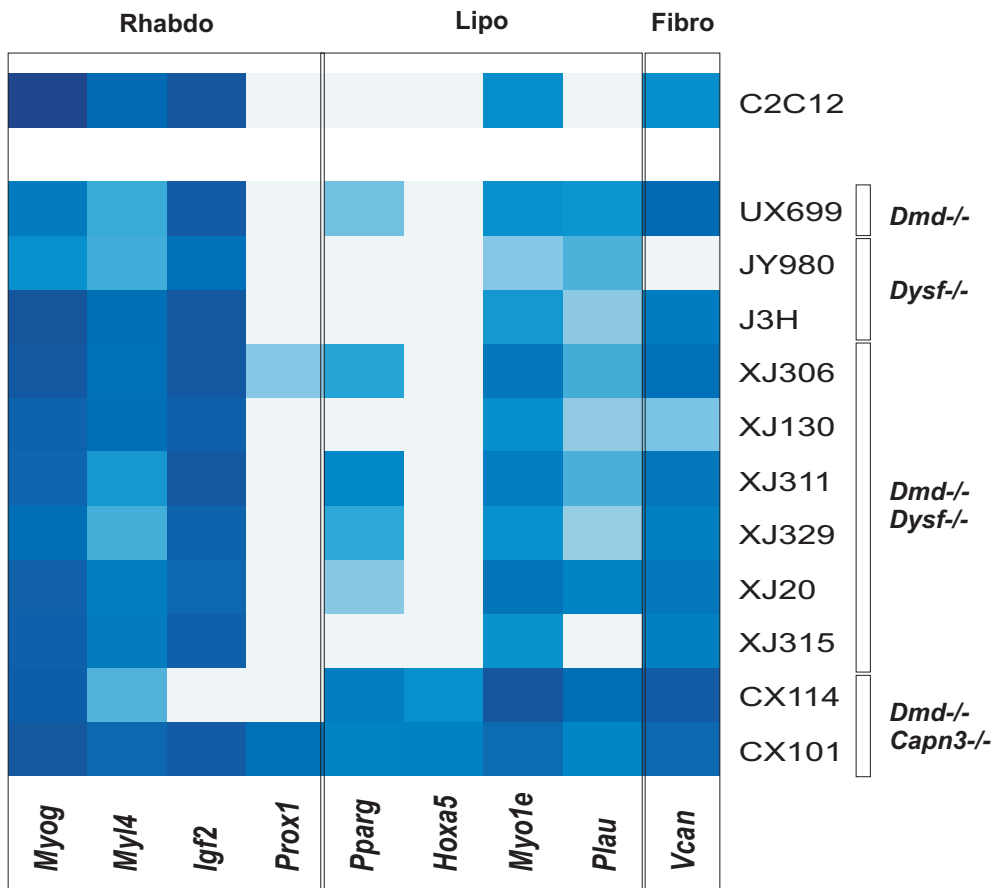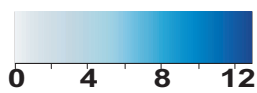

Supplement: pgen.1002042.s001.pdf [file pgen.1002042.s001.pdf]
